# Supplementary material for: Discovery Analysis of TCGA Data Reveals Association between Germline Genotype and Survival in Ovarian Cancer Patients
Source: PLOS journal article supplement (doi:10.1371/journal.pone.0055037), 2013-03-21
Supplement: S2 (10.1371/journal.pone.0055037.s002) [file journal.pone.0055037.s002]

## Supplementary File S2: Population Substructure

Of the 489 patients used in this analysis, 431 were white (self-reported), of whom 21 additionally self-reported Ashkenazi descent. (It should be noted that some individuals of the 410 White individuals may also be of Ashkenazi descent, since Ashkenazi ancestry was coded only as “ASHKENAZI” or a missing value, never explicitly non-Ashkenazi.)

Ethnicity was not associated with either genotype at rs4934282 (AGAP11/C10orf116) or rs1857623 (DNAH14), as shown in Table S2-1. In addition, survival was not significantly associated with race, although it was associated with Ashkenazi heritage as shown in Table S2-2. The associations of rs4934282 and rs1857623 with survival were not significantly altered when adjusting for Ashkenazi heritage.

|                                           | rs4934282 |     |    | rs1857623 |     |    |
|-------------------------------------------|-----------|-----|----|-----------|-----|----|
|                                           | AA        | AC  | CC | AA        | AG  | GG |
| White                                     | 130       | 185 | 86 | 124       | 192 | 86 |
| Ashkenazi                                 | 4         | 11  | 6  | 4         | 11  | 6  |
| Black or African American                 | 2         | 11  | 9  | 13        | 8   | 2  |
| American Indian or ALASKA Native          | 0         | 1   | 0  | 0         | 0   | 1  |
| Asian                                     | 1         | 11  | 2  | 3         | 7   | 4  |
| Native Hawaiian or Other Pacific Islander | 1         | 0   | 0  | 0         | 1   | 0  |
| N/A                                       | 6         | 9   | 3  | 6         | 8   | 5  |

Table S2-1: Genotypes by self-reported race and self-reported Ashkenazi descent. There is no association between ethnicity and genotype at either SNP.

|                           | <i>N</i> | H.R.  | <i>p</i>    |
|---------------------------|----------|-------|-------------|
| White                     | 410      | (ref) | (ref)       |
| Ashkenazi                 | 21       | 0.41  | <b>0.02</b> |
| Black or African American | 23       | 1.42  | 0.17        |
| Asian                     | 14       | 0.95  | 0.93        |
| N/A                       | 19       | 0.60  | 0.25        |

Table S2-2: Survival by self-reported ethnicity.

To assess the population stratification, we examined the principal components of the IBS kinship matrix as described in the text. The first 4 PCs contained the bulk of the variance. The R package mclust was used to cluster patients using between 4 and 10 PCs; clustering assignment did not change with the addition of PCs beyond the 4th. In all cases, the best-fit cluster model was obtained with 7 clusters. Cluster assignment and pairwise plots of the first 4 principal components are given in Figure S2-1. As shown in Table S2-3, certain clusters are associated with race/Ashkenazi background: blue, African-American; green, Asian; orange, Ashkenazi Jewish. No cluster exhibited differential survival (including the orange cluster comprising all 20 self-identified Ashkenazi Jews along with 33 Caucasians of unknown ancestry). In addition, no cluster was associated with genotype at either rs4934282 or rs1857623.

|                                           | cluster (colors reference Fig S2-1) |     |       |      |      |         |        |
|-------------------------------------------|-------------------------------------|-----|-------|------|------|---------|--------|
|                                           | black                               | red | green | blue | cyan | magenta | orange |
| White                                     | 44                                  | 311 | 1     | 1    | 12   | 8       | 33     |
| Ashkenazi                                 | 1                                   | 0   | 0     | 0    | 0    | 0       | 20     |
| Black or African American                 | 0                                   | 1   | 0     | 20   | 1    | 1       | 0      |
| American Indian or Alaska Native          | 0                                   | 1   | 0     | 0    | 0    | 0       | 0      |
| Asian                                     | 0                                   | 1   | 8     | 0    | 0    | 5       | 0      |
| Native Hawaiian or Other Pacific Islander | 0                                   | 0   | 1     | 0    | 0    | 0       | 0      |
| N/A                                       | 1                                   | 12  | 1     | 1    | 2    | 2       | 0      |

Table S2-3: Ethnic distribution by population cluster.

## Population Substructure (N=489)

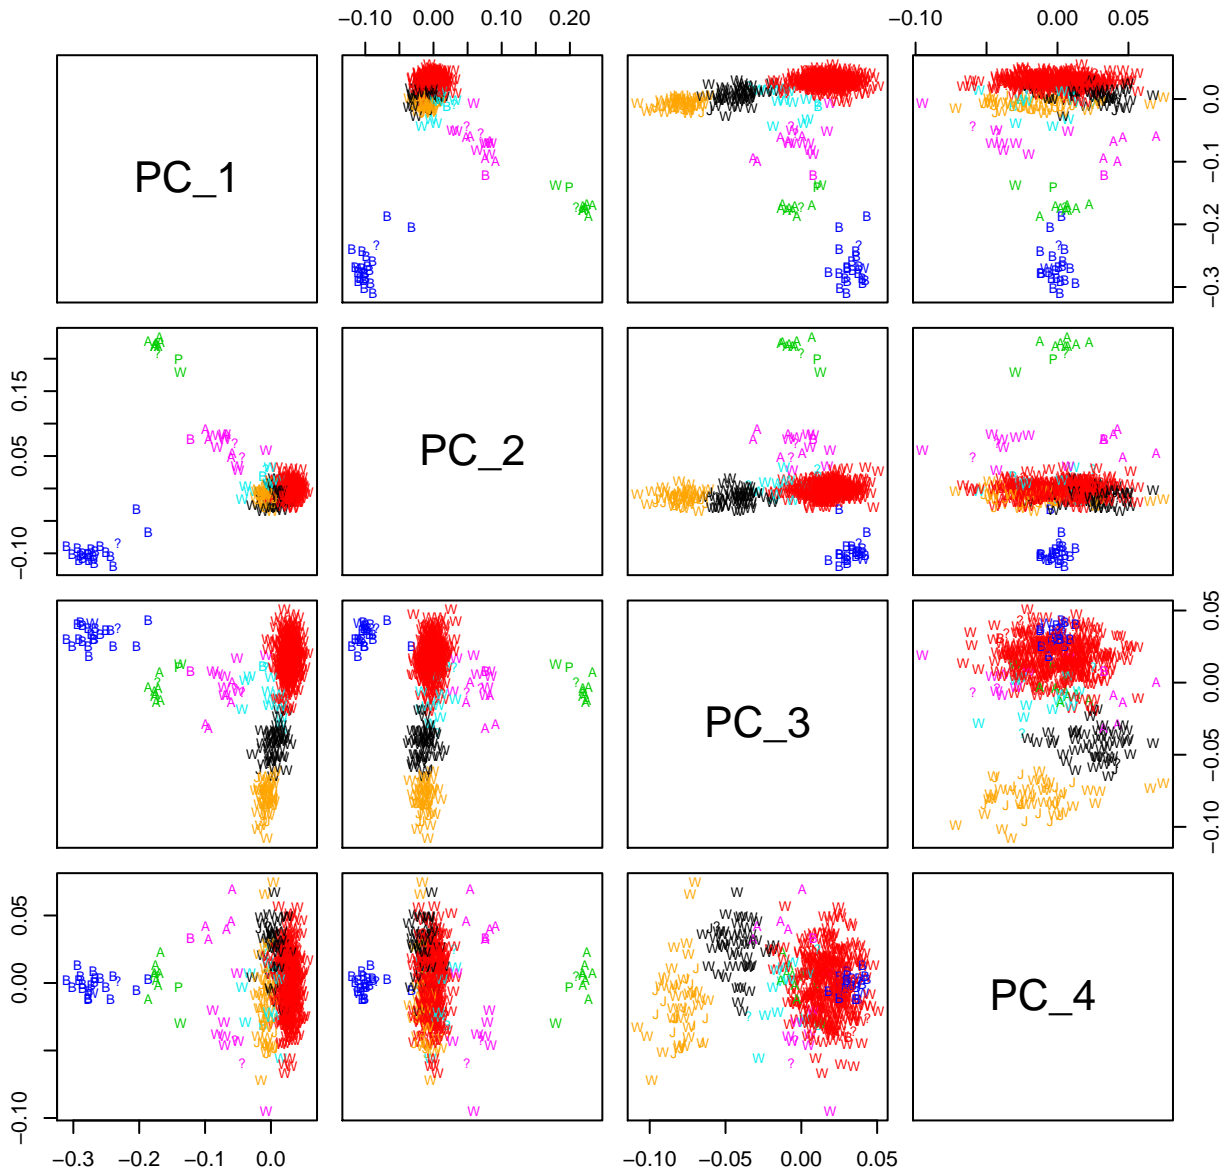

Figure S2-1: Genetic structure of 489 samples based on 12,000 SNPs. Shown are pairwise plots for the principal components of the kinship distance matrix; only the first four components exhibited structure. The principle components were used to cluster the samples using the R package mClust; 7 clusters were obtained, and cluster membership is indicated by color. Self-reported ethnicity is denoted by shape: “W”–white, “B”–Black or African American, “N”–American Indian or Alaskan Native, “A”–Asian, “P”–Native Hawaiian or other Pacific Islander, “J”–Ashkenazi, “?”–unknown.
